# Supplementary material
Source: PubMed Central journal article supplement (PMC4580609)
Supplement: supp_dc14-2732v142732_DC142732SupplementaryData.pdf [file supp_dc14-2732v142732_DC142732SupplementaryData.pdf]

SUPPLEMENTARY DATA

**Supplementary Table 1.** Definition of diabetes mellitus by cohort

| <b>Cohort</b> | <b>Definition of Diabetes Mellitus</b>                                                       |
|---------------|----------------------------------------------------------------------------------------------|
| AIR           | Self reported physician's diagnosis                                                          |
| ARIC          | ADA definition (RPG or FPG or OGTT) or preexisting antidiabetic medication                   |
| BHS           | FPG>126mg/dL or preexisting antidiabetic medication                                          |
| Bruneck       | Record-confirmed physician's diagnosis or HbA1c≥6.5%                                         |
| CAPS          | Self reported physician's diagnosis                                                          |
| CCCC          | FPG>140mg/dL or preexisting antidiabetic medication                                          |
| CHS           | Self reported physician's diagnosis                                                          |
| CMCS          | Self reported physician's diagnosis or preexisting antidiabetic medication                   |
| DIWA          | Oral glucose tolerance test                                                                  |
| EAS           | Self reported physician's diagnosis or preexisting antidiabetic medication                   |
| EPICARDIAN    | FPG≥126mg/dL or preexisting antidiabetic medication                                          |
| EVA           | Self reported physician's diagnosis or FPG≥7.8 mmol/L or preexisting antidiabetic medication |
| INVADE        | Self reported physician's diagnosis or preexisting antidiabetic medication                   |
| KIHD          | Self reported physician's diagnosis or preexisting antidiabetic medication                   |
| NOMAS/INVEST  | Self reported physician's diagnosis or FPG>126mg/dl or preexisting antidiabetic medication   |
| PIVUS         | Self reported physician's diagnosis or FPG≥7.0 mmol/L                                        |
| PLIC          | Self reported physician's diagnosis or preexisting antidiabetic medication                   |
| Rotterdam     | Self reported physician's diagnosis or preexisting antidiabetic medication                   |
| SAPHIR        | Self reported physician's diagnosis or preexisting antidiabetic medication                   |
| SHIP          | Self reported physician's diagnosis or HbA1c>6.5% or preexisting antidiabetic medication     |
| Tromsø        | Self reported physician's diagnosis or preexisting antidiabetic medication                   |

ADA = American Diabetes Association

RPG = random plasma glucose

FPG = fasting plasma glucose

OGTT = oral glucose tolerance test

SUPPLEMENTARY DATA

**Supplementary Table 2.** Definition of the combined endpoint, and available adjustment variables by cohort

| Study        | definition of the combined endpoint | ethnicity | Socio-economic status | systolic blood pressure |         | body mass index |         | total cholesterol |         | HbA1c   |         | fasting glucose |         | antihypertensive medication |         | Lipid lowering medication |         | smoking |         |
|--------------|-------------------------------------|-----------|-----------------------|-------------------------|---------|-----------------|---------|-------------------|---------|---------|---------|-----------------|---------|-----------------------------|---------|---------------------------|---------|---------|---------|
|              |                                     | BL        | BL                    | BL                      | FU      | BL              | FU      | BL                | FU      | BL      | FU      | BL              | FU      | BL                          | FU      | BL                        | FU      | BL      | FU      |
| AIR          | MI or stroke or vascular death      | yes       | missing               | yes                     | yes     | yes             | yes     | yes               | yes     | missing | missing | yes             | yes     | yes                         | yes     | yes                       | yes     | yes     | yes     |
| ARIC         | MI or stroke or death               | yes       | inc                   | yes                     | yes     | yes             | yes     | yes               | yes     | yes     | yes     | yes             | yes     | yes                         | yes     | yes                       | yes     | yes     | yes     |
| BHS          | n.a.                                | yes       | edu                   | yes                     | yes     | yes             | yes     | yes               | yes     | yes     | missing | yes             | yes     | yes                         | yes     | yes                       | yes     | yes     | yes     |
| Bruneck      | MI or stroke or vascular death      | yes       | ses                   | yes                     | yes     | yes             | yes     | yes               | yes     | missing | missing | yes             | yes     | yes                         | yes     | missing                   | missing | yes     | yes     |
| CAPS         | MI or stroke or death               | missing   | edu                   | yes                     | yes     | yes             | yes     | yes               | yes     | yes     | yes     | yes             | yes     | yes                         | yes     | yes                       | yes     | yes     | yes     |
| CCCC         | MI or stroke or death               | yes       | ses                   | yes                     | yes     | yes             | yes     | yes               | yes     | missing | missing | yes             | yes     | yes                         | missing | missing                   | missing | yes     | missing |
| CHS_1        | MI or stroke or vascular death      | yes       | edu                   | yes                     | yes     | yes             | yes     | yes               | yes     | missing | missing | yes             | yes     | yes                         | yes     | yes                       | yes     | yes     | yes     |
| CHS_2        | MI or stroke or vascular death      | yes       | inc                   | yes                     | yes     | yes             | missing | yes               | yes     | missing | missing | yes             | yes     | yes                         | yes     | yes                       | yes     | yes     | yes     |
| CMCS         | MI or stroke or vascular death      | yes       | edu                   | yes                     | yes     | yes             | yes     | yes               | yes     | missing | missing | yes             | yes     | yes                         | yes     | yes                       | yes     | yes     | yes     |
| DIWA         | MI or stroke or vascular death      | yes       | edu                   | yes                     | yes     | yes             | yes     | yes               | yes     | missing | missing | yes             | yes     | yes                         | missing | yes                       | missing | yes     | missing |
| EAS          | MI or stroke or vascular death      | missing   | ses                   | yes                     | yes     | yes             | yes     | yes               | missing | missing | missing | yes             | yes     | yes                         | missing | missing                   | missing | yes     | yes     |
| EPICARDIAN   | MI or stroke or vascular death      | missing   | missing               | yes                     | missing | yes             | missing | yes               | missing | missing | missing | yes             | missing | missing                     | missing | yes                       | missing | yes     | missing |
| EVA          | n.a.                                | missing   | missing               | yes                     | yes     | yes             | yes     | yes               | yes     | missing | missing | yes             | yes     | yes                         | yes     | yes                       | yes     | yes     | yes     |
| INVADE       | MI or stroke or death               | missing   | edu                   | yes                     | yes     | yes             | yes     | yes               | yes     | yes     | yes     | yes             | yes     | yes                         | yes     | yes                       | yes     | yes     | yes     |
| KIHD         | MI or stroke or vascular death      | yes       | edu                   | yes                     | yes     | yes             | yes     | yes               | yes     | missing | missing | yes             | yes     | yes                         | yes     | yes                       | yes     | yes     | yes     |
| NOMAS/INVEST | MI or stroke or vascular death      | yes       | edu                   | yes                     | missing | yes             | missing | yes               | yes     | missing | missing | yes             | yes     | yes                         | missing | yes                       | missing | yes     | missing |
| PIVUS        | n.a.                                | missing   | ses                   | yes                     | yes     | yes             | yes     | yes               | yes     | missing | missing | yes             | yes     | yes                         | yes     | yes                       | yes     | yes     | yes     |
| PLIC         | MI or stroke or vascular death      | missing   | missing               | yes                     | yes     | yes             | yes     | yes               | yes     | missing | missing | yes             | yes     | yes                         | yes     | missing                   | missing | yes     | yes     |
| Rotterdam    | MI or stroke or death               | yes       | edu                   | yes                     | yes     | yes             | yes     | yes               | yes     | missing | missing | missing         | yes     | yes                         | yes     | yes                       | yes     | yes     | yes     |
| SAPHIR       | MI or stroke or vascular death      | missing   | ses                   | yes                     | yes     | yes             | yes     | yes               | yes     | missing | missing | yes             | yes     | yes                         | yes     | yes                       | yes     | yes     | yes     |
| SHIP         | MI or stroke or death               | missing   | edu                   | yes                     | yes     | yes             | yes     | yes               | yes     | yes     | yes     | yes             | yes     | yes                         | yes     | missing                   | missing | yes     | yes     |
| Tromso       | MI or stroke or vascular death      | yes       | edu                   | yes                     | yes     | yes             | yes     | yes               | yes     | yes     | yes     | yes             | yes     | yes                         | yes     | yes                       | yes     | yes     | yes     |

BL = baseline visit  
 FU = follow-up visit  
 n.a. = not applicable (only total mortality available)  
 inc = household income  
 edu = education level  
 ses = socioeconomic status

SUPPLEMENTARY DATA

**Supplementary Table 3. Ultrasound protocols**

| Cohort       | CCA landmark                                                                                      | CCA length                                          | Avoid plaques   | ECG gated | Angle control    | Multiple scans | Central reading | Edge detection algorithm |
|--------------|---------------------------------------------------------------------------------------------------|-----------------------------------------------------|-----------------|-----------|------------------|----------------|-----------------|--------------------------|
| AIR          | Beginning of bulbar widening                                                                      | 1cm                                                 | No              | Yes       | No               | No             | Yes             | Yes                      |
| ARIC         | Beginning of bulbar widening                                                                      | 1cm                                                 | No              | Yes       | Yes              | Yes            | Yes             | No                       |
| BHS          | Beginning of bulbar widening                                                                      | 1cm                                                 | No              | Yes       | Yes              | Yes            | Yes             | No                       |
| Bruneck      | Beginning of bulbar widening                                                                      | 3cm                                                 | Yes             | Yes       | Yes              | No             | No              | No                       |
| CAPS         | 2cm proximal to the tip of the flow divider                                                       | up to 4cm                                           | Not specified   | No        | No               | No             | Yes             | Yes                      |
| CCCC         | 1cm proximal to the tip of the flow divider                                                       | 1cm                                                 | Yes             | Yes       | Yes              | Yes            | No              | No                       |
| CHS          | Beginning of bulbar widening or (if not determinable) 1cm proximal to the tip of the flow divider | 1cm                                                 | No              | No        | No               | No             | Yes             | No                       |
| CMCS         | Beginning of bulbar widening                                                                      | Three single measurements each in 3 segments of 1cm | Yes             | No        | No               | No             | Yes             | No                       |
| DIWA         | Beginning of bulbar widening                                                                      | 1cm                                                 | No <sup>+</sup> | Yes       | No               | No             | Yes             | Yes                      |
| EAS          | Beginning of bulbar widening                                                                      | 0,5cm                                               | Yes             | No        | No               | No             | Yes             | No                       |
| EPICARDIAN   | Beginning of bulbar widening                                                                      | 1cm                                                 | Yes             | No        | Yes              | Yes            | No              | No                       |
| EVA          | 2cm proximal to the tip of the flow divider                                                       | 2cm                                                 | Yes             | No        | Yes              | No             | Yes             | Yes                      |
| INVADE       | 1cm proximal to the tip of the flow divider                                                       | 1cm                                                 | Yes             | No        | Yes              | Yes            | Yes             | Yes                      |
| KIHD         | Beginning of bulbar widening                                                                      | 1-5cm                                               | No              | No        | No               | No             | Yes             | Yes                      |
| NOMAS/INVEST | 1cm proximal to the tip of the flow divider                                                       | 1cm                                                 | Yes             | No        | Yes <sup>#</sup> | No             | Yes             | Yes                      |
| PIVUS        | Beginning of bulbar widening                                                                      | 1cm                                                 | Not specified   | Yes       | No               | No             | Yes             | Yes                      |
| PLIC         | 2cm proximal to the tip of the flow divider                                                       | 2cm                                                 | Yes             | Yes       | No               | No             | Yes             | Yes                      |
| Rotterdam    | Beginning of bulbar widening                                                                      | 1cm                                                 | No              | Yes       | No               | Yes            | Yes             | Yes                      |
| SAPHIR       | 8 mm proximal to the tip of the flow divider                                                      | 8mm                                                 | Yes             | No        | Yes              | Yes            | No              | No                       |
| SHIP         | Beginning of bulbar widening                                                                      | 1cm                                                 | No              | No        | No               | No             | Yes             | Yes                      |
| Tromsø       | Beginning of bulbar widening                                                                      | 1cm                                                 | No <sup>+</sup> | Yes       | No               | Yes            | Yes             | Yes                      |

\*vessel wall parallel to transducer interface

<sup>#</sup>internal landmarks in computer aided navigation

<sup>+</sup>plaques purposely included

SUPPLEMENTARY DATA

**Supplementary Figure 1.** Flowchart showing numbers of screened and included publication and cohorts

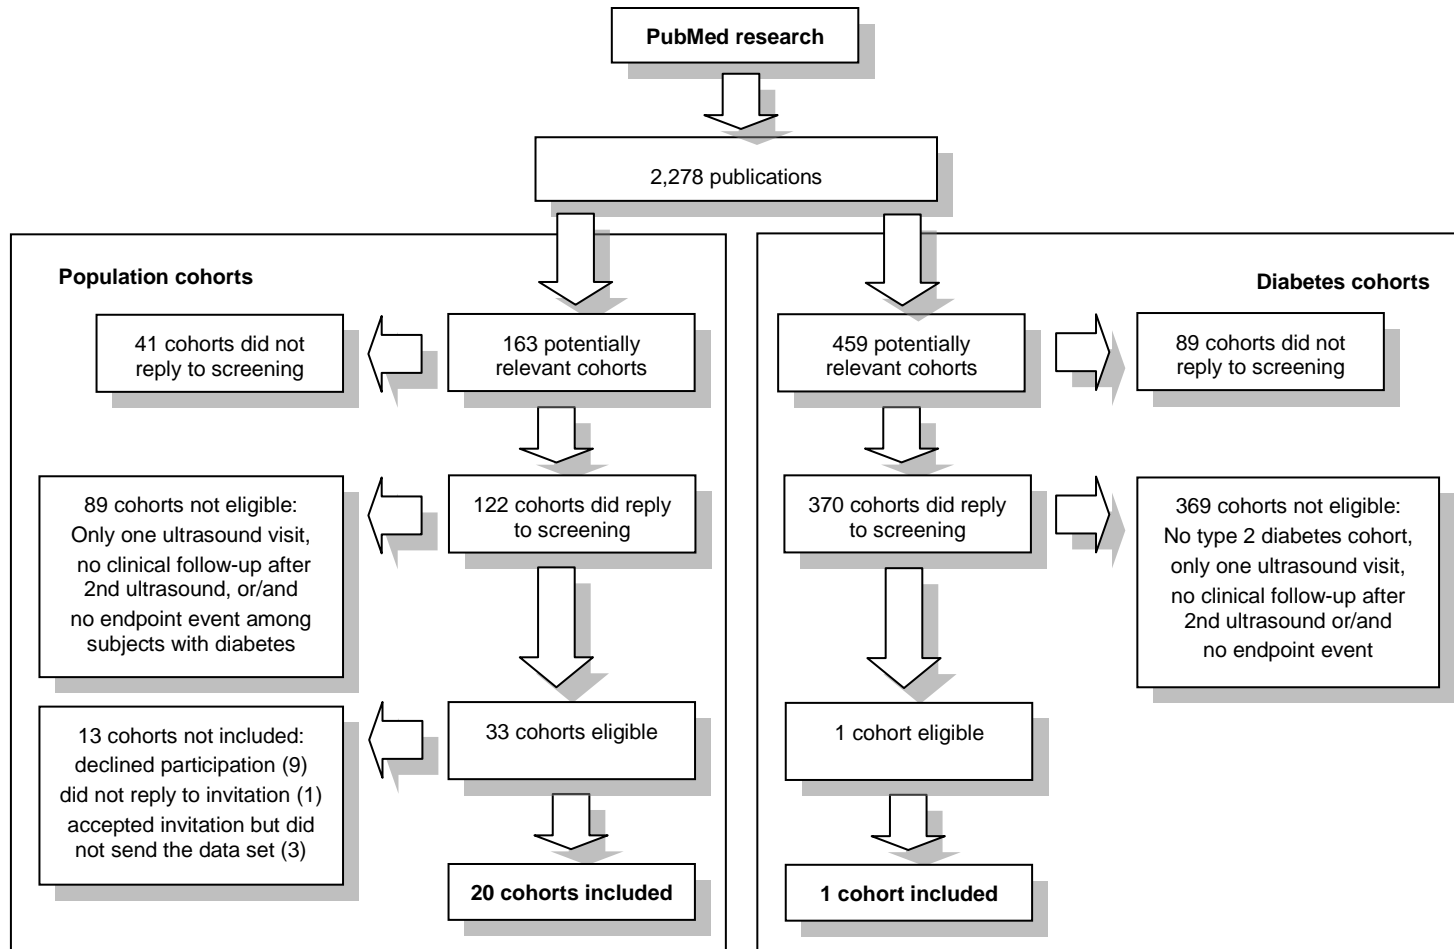

SUPPLEMENTARY DATA

**Supplementary Figure 2.** Forest plot of HR of the combined endpoint (MI or stroke or vascular death) per SD of average mean CCA-IMT (panels 1 and 2) in subjects without diabetes

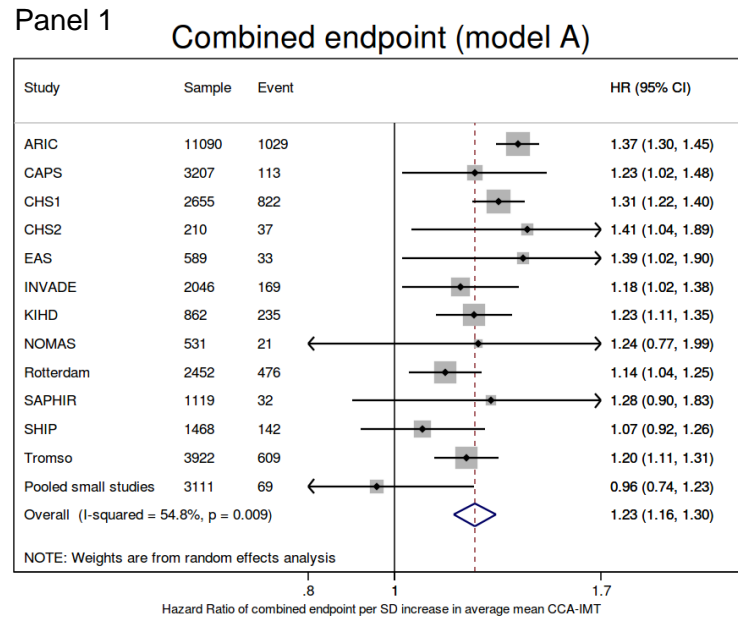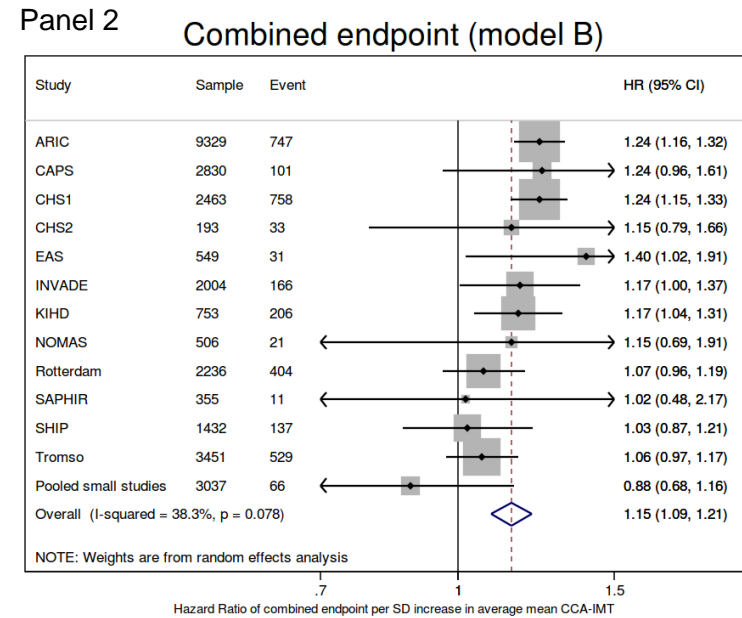

Note: pooled small studies included: AIR, CMCS, DIWA, EPICARDIAN and PLIC

SUPPLEMENTARY DATA

**Supplementary Figure 3.** Forest plot of HR of the combined endpoint (MI or stroke or vascular death) per SD of average maximal CCA-IMT (panels 1 and 2) and annual maximal CCA-IMT progression (panels 3 and 4)

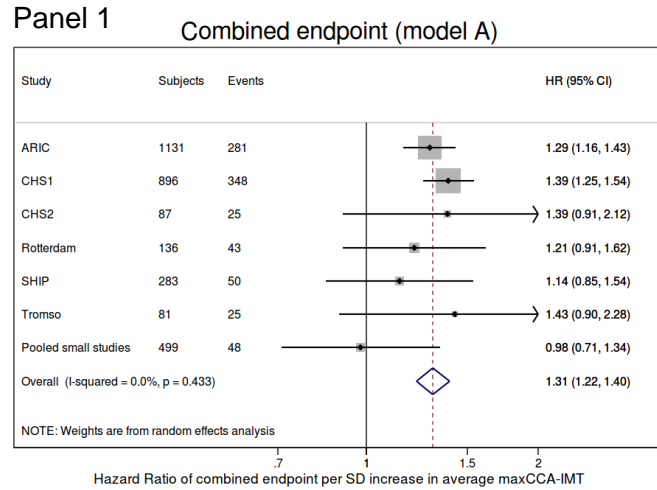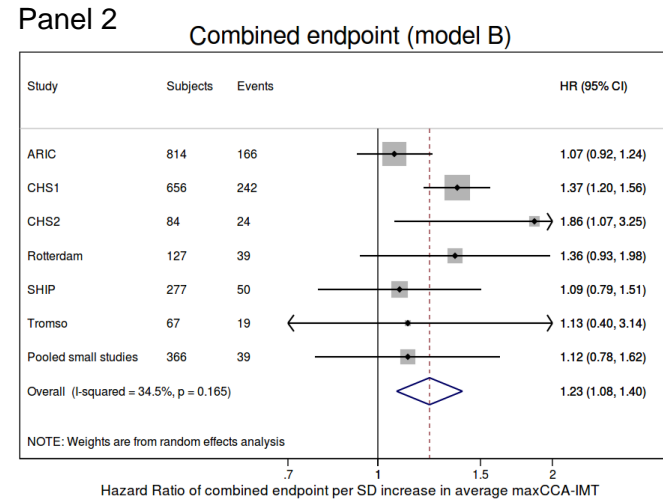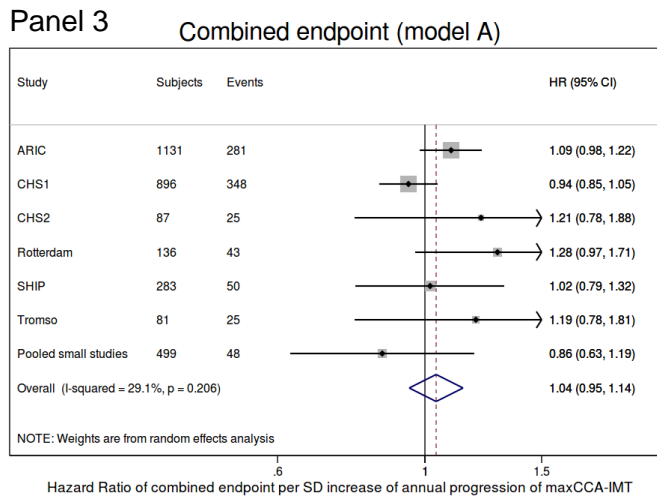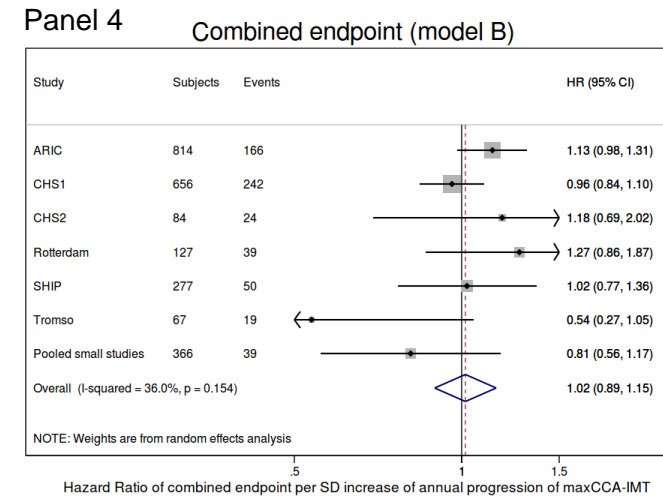

Note: pooled small studies included: AIR, BRUNECK, CCCC, CMCS, DIWA, KIHD, NOMAS/INVEST and PLIC

SUPPLEMENTARY DATA

**Supplementary Figure 4.** Forest plot of HR of total mortality per SD of average mean CCA-IMT (panels 1 and 2) and annual mean CCA-IMT progression (panels 3 and 4)

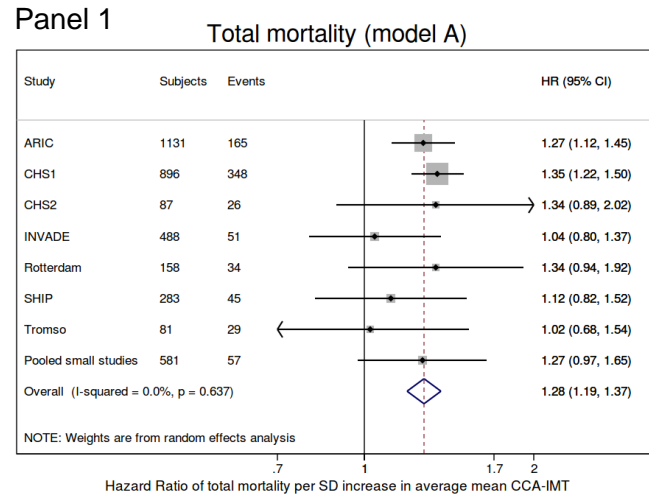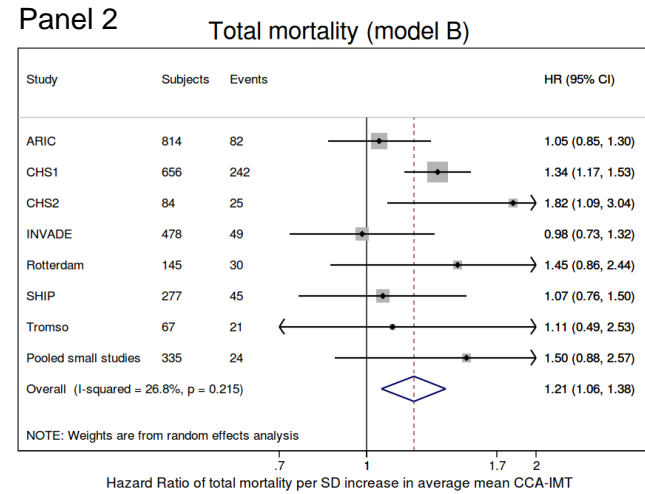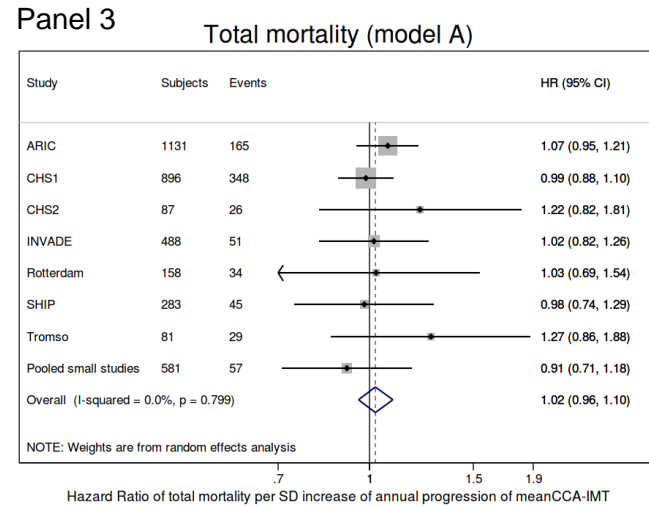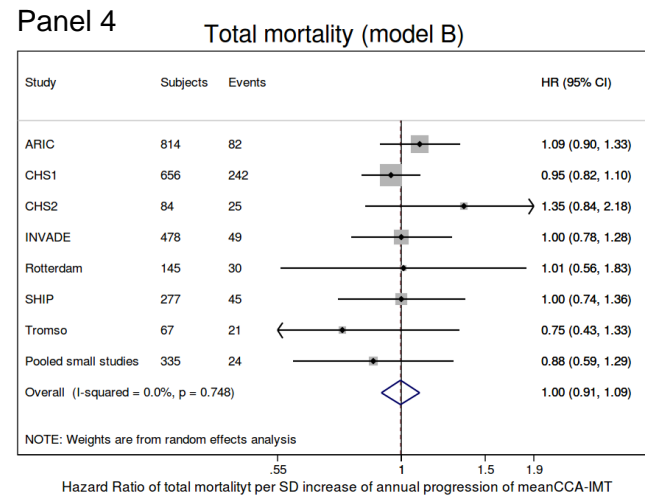

Note: pooled small studies included: AIR, CAPS, CMCS, DIWA, EAS, EPICARDIAN, EVA, KIH, NOMAS/INVEST, PIVUS and SAPHIR

SUPPLEMENTARY DATA

**Supplementary Figure 5.** Forest plot of HR of the combined endpoint per SD of average mean CCA-IMT (panels 1 and 2) and annual mean CCA-IMT progression (panels 3 and 4), stratified by sex

Panel 1

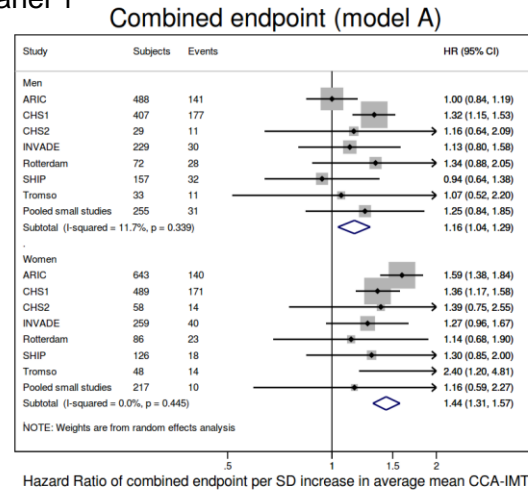

Panel 2

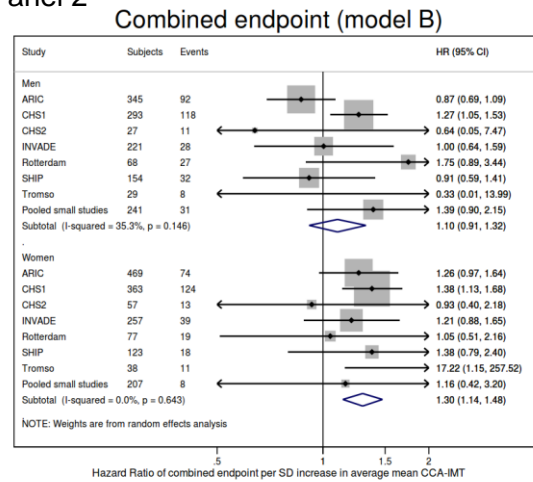

Panel 3

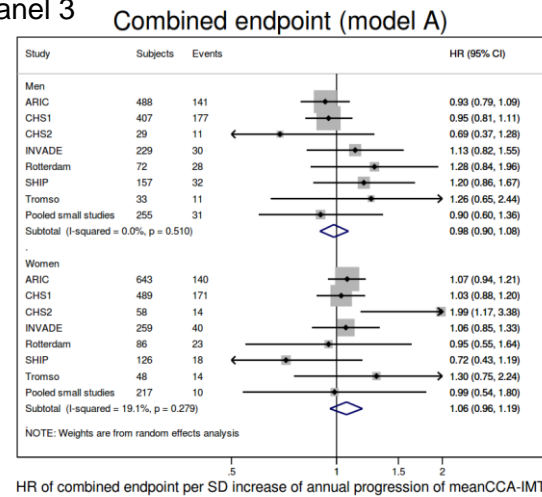

Panel 4

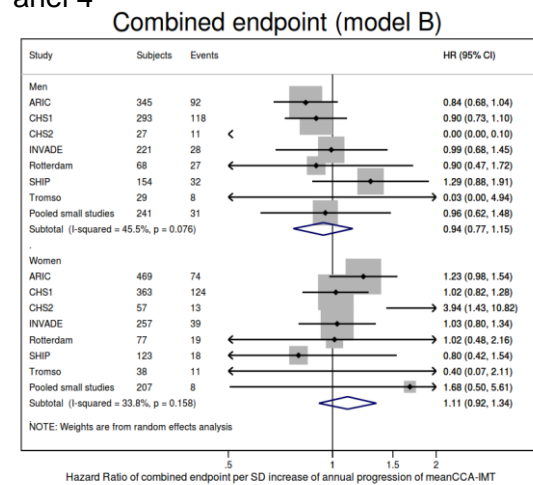

Note: pooled small studies included: AIR, CAPS, CMCS, DIWA, EAS, EPICARDIAN, KIH, NOMAS/INVEST, PLIC and SAPHIR



SUPPLEMENTARY DATA

**Supplementary Figure 6.** Forest plot of HR of the combined endpoint (model B) per SD of average mean CCA-IMT (panel 1) and annual mean CCA-IMT progression (panel 2), stratified by ethnicity

Panel 1 Combined endpoint (model B)

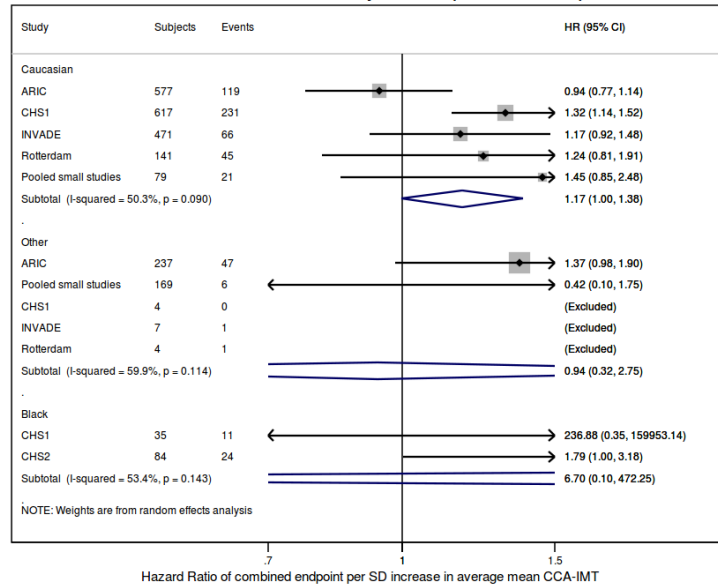

Panel 2 Combined endpoint (model B)

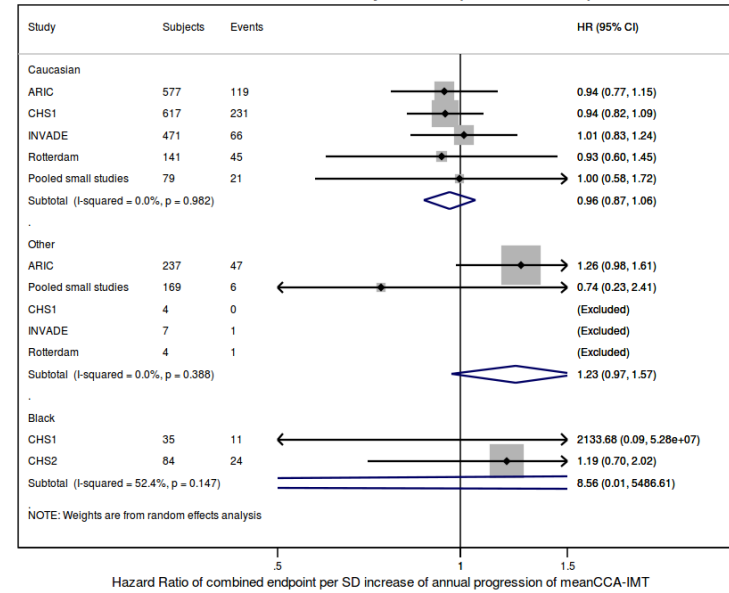

## SUPPLEMENTARY DATA

### Members of the PROG-IMT Study group

Status as of 05<sup>th</sup> november 2014

Stefan Agewall, MD, PhD, Prof.  
Institute of Clinical Sciences, University of Oslo, Oslo, Norway  
and  
Department of Cardiology, Oslo University Hospital Ullevål, Oslo, Norway

Tadao Akizawa, MD, PhD, Prof  
Division of Nephrology, Department of Medicine, Showa University School of Medicine, Tokyo, Japan

Mayuko Amaha, MD  
Division of Nephrology, Department of Internal Medicine, Shinmatsudo Central General Hospital, Chiba, Japan

Mauro Amato, PhD  
Centro Cardiologico Monzino, IRCCS, Milan, Italy

Steen Andersen, MD, DMSc  
Steno Diabetes Center, Gentofte, Denmark

Sigmund A. Anderssen, PhD, Prof  
Norwegian School of Sports Sciences, Oslo, Norway

Aleksandra Araszkiwicz, MD, PhD, Assoc. Prof.  
Department of Internal Medicine and Diabetology, Poznan University of Medical Sciences, Poznan, Poland

Folkert W. Asselbergs, MD, PhD, Assoc. Prof.  
Department of Cardiology, Division Heart & Lungs, University Medical Center Utrecht, Utrecht, the Netherlands

Gülây Asçi, Prof. Dr.  
Nefroloji Bilim Dalı, Tıp Fakültesi, Ege Üniversitesi, Bornova-Izmir, Turkey

Jang-Ho Bae, MD., PhD., FACC.  
College of Medicine, Konyang University Hospital, Daejeon, Korea  
and  
Heart Center, Konyang University Hospital, Daejeon, Korea

Tatyana Balakhonova, MD, PhD, Prof.  
Ultrasound Vascular Laboratory, Cardiology Research Center, Moscow, Russia

Damiano Baldassarre, PhD, Prof  
Centro Cardiologico Monzino, IRCCS, Milan, Italy  
and  
Dipartimento di Scienze Farmacologiche e Biomolecolari, Università di Milano, Milan, Italy

Edith Beishuizen  
Department of General Internal Medicine, Leiden University Medical Center, Leiden, the Netherlands

Oscar Beloqui, MD, PhD  
Department of Internal Medicine,  
University Clinic of Navarra, Navarra,  
Spain

Gerald Berenson, MD, Prof.  
Department of Medicine, Pediatrics,  
Biochemistry, Epidemiology, Tulane  
University School of Medicine and School  
of Public Health and Tropical Medicine,  
New Orleans, USA

Göran Bergström, MD, PhD, Prof  
Wallenberg Laboratory for Cardiovascular  
Research, Sahlgrenska Academy,  
Gothenburg University, Göteborg,  
Sweden

Enrique Bernal, MD, PhD  
Infectious Diseases Unit, Hospital Reina  
Sofía, Murcia, Spain

Sebastjan Bevc, MD, PhD, Assist Prof  
Department of Nephrology, Clinic for  
Internal Medicine, University Medical  
Centre Maribor, Maribor, Slovenia

Lokpal Bhatia, MB BCH  
Faculty of Medicine, Human Development  
& Health Academic Unit, University of  
Southampton - Southampton General  
Hospital, Southampton, UK  
and  
Southampton NIHR Biomedical Research  
Centre, University Hospital Southampton -  
Southampton General Hospital, ,

Horst Bickel, PhD  
Department of Psychiatry and  
Psychotherapy, Technische Universität  
München, Munich, Germany

Stefan Blankenberg, MD, Prof.  
2nd Department of Medicine, Johannes  
Gutenberg-Universität, Mainz, Germany  
and  
Department of Cardiology, University  
Hospital Hamburg-Eppendorf, Hamburg,  
Germany

Peter J. Blankestijn  
Department of Nephrology, University  
Medical Center Utrecht, Utrecht, The  
Netherlands

James A Blumenthal, PhD  
Department of Psychiatry and Behavioral  
Sciences, Duke University Medical  
Center, Durham, NC 27710, USA

Lena Bokemark, MD, PhD  
Wallenberg Laboratory for Cardiovascular  
Research, Institution for Medicine,  
Department for Molecular and Clinical  
Medicine, Sahlgrenska Academy,  
Gothenburg University, Gothenburg,  
Sweden

Jackie Bosch, MSc  
Population Health Research Institute,  
McMaster University, Hamilton, Ontario,  
Canada

Michiel Bots, MD, PhD, Prof  
Julius Center for Health Sciences and  
Primary Care, University Medical Center  
Utrecht, Utrecht, the Netherlands

Frank P. Brouwers, MD, PhD  
Department of Cardiology, University  
Medical Center Groningen, Groningen,  
the Netherlands

Christopher D. Byrne, MB BCH, PhD, Prof.  
Faculty of Medicine, Human Development  
& Health Academic Unit, University of  
Southampton - Southampton General  
Hospital, Southampton, UK  
and  
Southampton NIHR Biomedical Research  
Centre, University Hospital Southampton -  
Southampton General Hospital, ,

Alpaslan Bülbül, MPH  
Department of Neurology, Goethe  
University, Frankfurt am Main, Germany

Philip C. Calder, PhD, Prof.  
Faculty of Medicine, Human Development  
& Health Academic Unit, University of  
Southampton - Southampton General  
Hospital, Southampton, UK  
and  
Southampton NIHR Biomedical Research  
Centre, University Hospital Southampton -  
Southampton General Hospital, ,

Yong-Jun Cao, MD, PhD  
Department of Neurology, Institute of  
Neuroscience, the Second Affiliated  
Hospital of Soochow University, Soochow,  
China

Samuela Castelnovo, PhD  
Centro Dislipidemie E. Grossi  
Paoletti, Ospedale Ca' Granda di Niguarda  
, Milan, Italy

Aiberico Catapano, PhD, Prof.  
IRCSS Multimedica, Milan, Italy  
and  
Department of Pharmacological and  
Biomolecular Sciences, University of  
Milan, Milan, Italy

Chen-Huan Chen, Prof, MD  
National Yang-Ming University, Taipei,  
Taiwan

Kuo-Liong Chien, MD, Prof  
Institute of Epidemiology and Preventive  
Medicine, College of Public  
Health, National Taiwan University, Taipei,  
Taiwan

Ana Rosa Cunha, PhD  
State University of Rio de Janeiro, Rio de  
Janeiro, Brazil

## SUPPLEMENTARY DATA

Francois Dabis, MD, PhD, Prof.  
Centre de Recherche INSERM  
U.897, Institut de Santé Publique,  
Epidémiologie et Développement  
(ISPAD), Université Victor Segalen  
Bordeaux 2, Bordeaux Cedex, France

Jesse Dawson, Dr.  
Institute of Cardiovascular and Medical  
Sciences, University of Glasgow, Glasgow,  
UK

Ralph A. DeFronzo, MD  
University of Texas Health Science  
Center, San Antonio, USA

Jaqueline .M. Dekker, Prof  
Department of Epidemiology and  
Biostatistics, University Medical Center ,  
Amsterdam, the Netherlands  
and  
EMGO Institute for Health and Care  
Research, VU University Medical Center,  
Amsterdam, the Netherlands

Moise Desvarieux, MD, PhD, Assoc. Prof.  
Department of Epidemiology, Mailman  
School of Public Health, Columbia  
University, New York, USA

Chrystosomos Dimitriadis, MD  
University Department of Nephrology,  
Hippokraton General Hospital,  
Thessaloniki, Greece

Pierre Ducimetiere, Prof.  
University Paris\_Sud XI, Kremlin-Bicêtre,  
Le Kremlin-Bicêtre, France

Leanne Dyal, MSc  
Population Health Research Institute,  
McMaster University, Hamilton, Ontario,  
Canada

Marcus Dörr, MD, Prof.  
Department B for Internal Medicine,  
University Medicine Greifswald,  
Greifswald, Germany  
and  
German Center for Cardiovascular  
Research (DZHK), partner site Greifswald ,  
Greifswald, Germany

Helen Eddington, MD  
University Hospitals Birmingham,  
Birmingham, UK

Robert Ekart, MD, PhD, Assist. Prof  
Department of Dialysis, Clinic for Internal  
Medicine, University Medical Centre  
Maribor, Maribor, Slovenia

Jean Philippe Empana, MD, PhD  
Paris Cardiovascular Research Centre  
(PARCC), University Paris Descartes,  
Sorbonne Paris Cité, UMR-S970, Paris,  
France

Gunnar Engström, MD, PhD, Prof.  
Department of Clinical Sciences in Malmö,  
Lund University, Malmö, Sweden

Mark A. Espeland, PhD, Prof.  
Department of Biostatistical Sciences,  
Wake Forest School of Medicine,  
Winston-Salem, NC, USA

Christine Espinola-Klein, MD, Prof.  
2nd Department of Medicine, Johannes-  
Gutenberg University, Mainz, Germany

Ramon Estruch, MD, PhD  
Endocrinology & Nutrition Service,  
Hospital Clínic, Barcelona, Spain

Thorleif Etgen, MD, PD  
Department of Neurology, Kliniken  
Südostbayern, Klinikum Traunstein,  
Traunstein, Germany  
and  
Department of Psychiatry and  
Psychotherapy, Technische Universität  
München, Munich, Germany

Marat Ezhov, MD, PhD  
Atherosclerosis Department, Cardiology  
Research Center , Moscow, Russia

Björn Fagerberg, MD, PhD, Prof  
Wallenberg Laboratory for Cardiovascular  
Research, Institution for Medicine,  
Department for Molecular and Clinical  
Medicine, Sahlgrenska Academy,  
Gothenburg University, Gothenburg,  
Sweden

Oscar H. Franco, MD, PhD, FESC, FFPH,  
Prof.  
Department of Epidemiology, Erasmus  
MC, University Medical Center Rotterdam,  
Rotterdam, the Netherlands

Beat Frauchiger, MD, Prof.  
Department of Internal Medicine, Division  
of Angiology, Kantonsspital Frauenfeld,  
Frauenfeld, Switzerland

Alfonsa Frieria, MD  
Radiology Department, Hospital  
Universitario de la Princesa, Universidad  
Autónoma de Madrid, Madrid, Spain

Rafael Gabriel, Prof., MD, PhD  
Instituto de Investigación IdiPAZ, Hospital  
Universitario La Paz, Madrid, Spain

Greg Gamble, MSc  
Department of Medicine, The University of  
Auckland, Auckland, New Zealand

Lu Gao, MSc  
MRC Biostatistics Unit, Institute of Public  
Health, University Forvie Site, Cambridge,  
UK

Rachel Georgiou  
Salford Royal Hospitals NHS Foundation  
Trust, Salford, UK

Hertzel C. Gerstein, MD, MSc  
Department of Medicine and Population  
Health Research Institute, McMaster  
University , Hamilton, Ontario, Canada

Paolo Gesele, Prof, MD, PhD  
Department of Internal Medicine, Division  
of Internal and Cardiovascular  
Medicine, University of Perugia, Perugia,  
Italy

Liliana Grigore, MD  
Centro Sisa per lo Studio della  
Aterosclerosi, Bassini Hospital, Cinisello  
Balsamo, Italy

Diederick E. Grobbee, MD, PhD, Prof  
Julius Center for Health Sciences and  
Primary Care, University Medical Center  
Utrecht, Utrecht, the Netherlands

Muriel P.C. Grooteman  
Institute for Cardiovascular Research VU  
Medical Center (ICaR-VU), VU Medical  
Center, Amsterdam, The Netherlands  
and  
Department of Nephrology, VU Medical  
Center, Amsterdam, The Netherlands

Giuseppe Guglielmini, MD, PhD  
Division of Internal and Cardiovascular  
Medicine, Department of Internal  
Medicine, University of Perugia, Perugia,  
Italy

Félix Gutiérrez, MD, PhD  
Clinical Medicine, Hospital General  
Universitario de Elche, University Miguel  
Hernández, Elche, Alicante, Spain

Apostolos I. Hatzitolios, MD, PhD, FESH,  
Prof.  
Head of first1 Propedeutic Department of  
Internal Medicine, Medical School, Aristotle  
University of Thessaloniki - AHEPA  
Hospital, Thessaloniki, Greece

Bo Hedblad, MD, PhD, Prof  
Department of Clinical Sciences in Malmö,  
Lund University, Malmö, Sweden

Frans A. Helmond, PhD  
Merck Research Laboratories,  
Kenilworth, NJ, USA

Peter Higgins, Dr.  
Institute of Cardiovascular and Medical  
Sciences, University of Glasgow, Glasgow,  
UK

Alan Hinderliter, MD  
Department of Medicine, University of  
North Carolina, Chapel Hill, USA

Albert Hofman, MD, PhD, Prof.  
Department of Epidemiology, Erasmus  
University Medical Center, Rotterdam, the  
Netherlands

Radovan Hojs, MD, PhD, Prof  
Department of Nephrology, Clinic for  
Internal Medicine, University Medical  
Centre Maribor, Maribor, Slovenia  
and  
Faculty of Medicine, University of Maribor,  
Maribor, Slovenia

Hirokazu Honda, MD, PhD, Assoc. Prof.  
Division of Nephrology, Department of  
Medicine, Showa University Koto Toyosu  
Hospital, Tokyo, Japan

Satoshi Hoshida, MD  
Department of Medicine, Division of  
Cardiovascular Medicine, Jichi Medical  
University School of Medicine, Tochigi,  
Japan

Menno V. Huisman  
Department of Thrombosis and  
Hemostasis, Leiden University Medical  
Center, Leiden, the Netherlands

## SUPPLEMENTARY DATA

Joseph Hung, Winthrop Professor, MBBS (hons) FRACP FACC  
Department of Cardiovascular Medicine, Sir Charles Gairdner Hospital, Nedlands, Australia  
and  
School of Medicine and Pharmacology, University of Western Australia, Nedlands, Australia

Bernhard Iglseder, MD, Prof  
Parcelsus Medical University, Salzburg, Austria  
and  
Department of Geriatric Medicine, Gemeinnützige Salzburger Landeskliniken Betriebsgesellschaft GmbH Christian-Doppler-Klinik, Salzburg, Austria

M. Arfan Ikram, MD, PhD, Assoc. Prof.  
Department of Epidemiology, Erasmus University Medical Center, Rotterdam, the Netherlands  
and  
Department of Neurology, Erasmus University Medical Center, Rotterdam, the Netherlands  
and  
Department of Radiology, Erasmus University Medical Center, Rotterdam, the Netherlands

Raffaele Izzo, MD, Prof.  
School of Medicine, Federico II University, Naples, Italy

Lisa M Jamieson, Assoc Prof  
Australian Research Centre for Population Oral Health, School of Dentistry, The University of Adelaide, Adelaide, Australia

Stein Harald Johnsen, MD, PhD, Assoc. Prof.  
Department of Clinical Medicine, University of Tromsø, Tromsø, Norway  
and  
Department of Neurology, University Hospital of Northern Norway, Tromsø, Norway

Aleksandar Jovanovic, MD, PhD, Prof  
Faculty of Medicine, University of Prishtina, Prishtina/Kosovska Mitrovica, Serbia

Anna Kablak-Ziembicka, MD, PhD, Prof.  
Department of Interventional Cardiology, Institute of Cardiology, Collegium Medicum Jagiellonian University, Krakow, Poland

Philip Kalra, MD, PhD, Prof.  
Department of Renal Medicine, Manchester Academic Health Sciences Centre, Salford Royal Hospital, Manchester, UK

Kostas Kapellias  
Australian Research Centre for Population Oral Health, School of Dentistry, The University of Adelaide, Adelaide, Australia

Kazuomi Kario  
Department of Medicine, Division of Cardiovascular Medicine, Jichi Medical University School of Medicine, Tochigi, Japan

John JP Kastelein, MD, Prof  
Department of Vascular Medicine, Academic Medical Center, University of Amsterdam, Amsterdam, the Netherlands

Akihiko Kato, MD, Prof.  
Blood Purification Unit, Hamamatsu University Hospital, Hamamatsu, Japan

Jussi Kauhanen, MD, Prof  
Institute of Public Health and Clinical Nutrition, University of Eastern Finland, Kuopio Campus, Kuopio, Finland

Maryam Kavousi, MD, PhD  
Department of Epidemiology and Biostatistics, Erasmus Medical Center, Rotterdam, the Netherlands

Masanori Kawasaki, MD, PhD, Assoc. Prof  
Department of Cardiology, Gifu University Graduate School of Medicine, Gifu, Japan

Stefan Kiechl, MD, Prof  
Department of Neurology, Medical University Innsbruck, Innsbruck, Austria

Jang-Young Kim, MD PhD  
Department of Cardiology, Institute of Genomic Cohort, College of Medicine Yonsei University, Wonju, Korea

Kazuo Kitagawa, MD, PhD  
Department of Neurology, Tokyo Women's Medical University, Tokyo, Japan

Sverre E. Kjeldsen, MD, PhD, Prof.  
Department of Cardiology, Ullevaal University Hospital, Oslo, Norway

Sang Back Koh, MD PhD  
Preventive Medicine, College of Medicine, Institute of Genomic Cohort, Yonsei University, Wonju, Korea

Svetlana Kostic, MSc, MD  
Primarius Institute for Therapy and Rehabilitation, "Niska Banja", Nis, Serbia

Manuel F Landecho, MD, PhD  
Department of Internal Medicine, University Clinic of Navarra, Navarra, Spain

Tatjana Lazarevic, MA  
Faculty of Medicine, University of Kragujevac, Kragujevac, Serbia

Moo-Sik Lee, MD., PhD., Prof.  
College of Medicine, Konyang University Hospital, Daejeon, Korea  
and  
Department of Preventive Medicine, Konyang University, Daejeon, Korea

Seung Hwan Lee, M.D., PhD, Prof.  
Department of Cardiology, College of Medicine, Yonsei University, Wonju, Korea

Ximing Liao, BSc, MSc, PhD  
Department of Neurology, Goethe University, Frankfurt am Main, Germany

Hung-Ju Lin, MD  
Department of Internal Medicine, National Taiwan University Hospital, Taipei, Taiwan

Yao-Ping Lin, MD  
Taipei Veterans General Hospital, Taipei, Taiwan

Lars Lind, MD, PhD, Prof  
Department of Medicine, Uppsala University, Uppsala, Sweden

Chun-Feng Liu, MD, PhD, Prof  
Department of Neurology, Institute of Neuroscience, the Second Affiliated Hospital of Soochow University, Soochow, China

Jing Liu, MD, PhD, Prof.  
Department of Epidemiology, Beijing Institute of Heart, Lung and Blood Vessel Diseases, Beijing Anzhen Hospital, Capital Medical University, Beijing, China

Eva Lonn, MD, MSc, FRCPC, FACC, Prof.  
Department of Medicine and Population Health Research Institute, McMaster University, Hamilton, Ontario, Canada

Matthias W. Lorenz, MD, PD  
Department of Neurology, Goethe University, Frankfurt am Main, Germany

Dianna Magliano, Assoc. Prof  
Baker/DI Heart and Diabetes Institute, Melbourne, Australia

Francesca Mallamaci, MD  
Institute of Biomedicine (CNR), Centre of Clinical Physiology and Division of Nephrology, Reggio Calabria, Italy

Mar Masiá, MD, PhD  
Cinical Medicine, Hospital General Universitario de Elche, University Miguel Hernández, Elche, Alicante, Spain

Ellisiv B. Mathiesen, MD, PhD, Prof.  
Department of Clinical Medicine, University of Tromsø, Tromsø, Norway  
and  
Department of Neurology and Neurophysiology, University Hospital of Northern Norway, Tromsø, Norway

Barry P. McGrath, Prof  
Department of Vascular Sciences, Monash University, Dandenong Hospital, Melbourne, Australia

Stela McLachlan, PhD  
Centre for Population Health Sciences, University of Edinburgh, Edinburgh, UK

John McNeil, PhD, Prof., MBBS  
School of Public Health and Preventive Medicine, Monash University, Melbourne, Australia

## SUPPLEMENTARY DATA

Brendan McQuillan, Assoc. Prof, MBBS  
PhD FRACP  
Department of Cardiovascular Medicine,  
Sir Charles Gairdner Hospital, Nedlands,  
Australia  
and  
School of Medicine and Pharmacology,  
University of Western Australia, Nedlands,  
Australia

Patrick Mercié, Prof  
Service de Médecine Interne, Hôpital  
Saint-André, CHU de Bordeaux, Bordeaux,  
France

Rino Migliacci, MD  
Division of Internal Medicine, Ospedale  
della Valdichiana "S. Margherita", Cortona,  
Italy

Dragan Mijalkovic, MD  
Primarius, Polyclinic "Kardiomedika", Nis,  
Serbia

Firouzeh Moeinzadeh, MD  
Isfahan Kidney Disease Research  
Center, Isfahan University of Medical  
Sciences, Isfahan, Iran

Mojgan Mortazavi, MD, Assoc. Prof.  
Nephrology department, Isfahan Kidney  
Diseases Research Center, Isfahan  
University of medical sciences, Isfahan,  
Iran

Veronica A. Myasoedova, MD, PhD  
Laboratory of Angiopathology, Institute of  
General Pathology and Pathophysiology,  
Moscow, Russia

Michiaki Nagai, MD  
Department of Medicine, Division of  
Cardiovascular Medicine, Jichi Medical  
University School of Medicine, Tochigi,  
Japan

Tsukasa Nakamura, MD, PhD  
Division of Nephrology, Department of  
Internal Medicine, Shinmatsudo Central  
General Hospital, Chiba, Japan

Prabath W.B. Nanayakkara  
Department of Clinical  
Neurophysiology, Medical Center, VU  
University Amsterdam, Amsterdam, the  
Netherlands

Dariusz Naskret, MD, PhD  
Department of Internal Medicine and  
Diabetology, Poznan University of Medical  
Sciences, Poznan, Poland

Mario Fritsch Neves, MD, PhD  
State University of Rio de Janeiro, Rio de  
Janeiro, Brazil

Pythia T. Nieuwkerk, PhD  
Department of Medical Psychology,  
Academic Medical Center, Amsterdam,  
the Netherlands

G Nijpels, MD, PhD  
Department of General Practice, VU  
University Medical Center, Amsterdam,  
the Netherlands  
and  
EMGO Institute for Health and Care  
Research, VU University Medical Center,  
Amsterdam, the Netherlands

Giuseppe D. Norata, PhD  
Dipartimento di Scienze Farmacologiche e  
Biomolecolari, Università degli Studi di  
Milano, Milan, Italy  
and  
SISA Center for the Study of  
Atherosclerosis, Bassini Hospital,  
Cinisello Balsamo, Italy

George Ntaios, MD, MSc (Stroke Med),  
PhD, FESO  
Department of Medicine, University of  
Thessaly, Larissa, Greece

Shuhei Okazaki, MD  
Department of Neurology, Osaka  
University Graduate School of Medicine,  
Osaka, Japan

Michael Hecht Olsen, MD, PhD, DMSc,  
Prof  
Cardiovascular and Metabolic Preventive  
Clinic, Department of  
Endocrinology, Odense University  
Hospital, Odense, Denmark

Alexander N. Orekhov, PhD, DSc  
Institute for atherosclerosis  
Research, Skolkovo Innovation Center,  
Moscow, Russia  
and  
Laboratory of Angiopathology, Institute of  
General Pathology and Pathophysiology,  
Moscow, Russia

Aikaterini Papagianni, MD, Assoc. Prof.  
University Department of Nephrology,  
Hippokraton General Hospital,  
Thessaloniki, Greece

Hyun Woong Park, M.D.  
College of Medicine, Konyang University  
Hospital, Daejeon, Korea

Grace Parraga, Dr  
Robarts Research Institute, Western  
University, London, Canada

Sharif Pasha  
Department of General Internal Medicine,  
Leiden University Medical Center, Leiden,  
the Netherlands

Matthieu Plichart, MD, PhD  
Assistance Publique, Hôpitaux de Paris,  
Hôpital Broca, Paris, France  
and  
Paris Cardiovascular Research Centre  
(PARCC), University Paris Descartes,  
Sorbonne Paris Cité, UMR-S970, Paris,  
France

Janice Pogue, PhD  
Population Health Research Institute,  
McMaster University, Hamilton, Ontario,  
Canada

Joseph F. Polak, MD, MPH, Prof  
Tufts University School of Medicine, Tufts  
Medical Center, Boston, USA

Holger Poppert, MD, PhD  
Department of Neurology, Technische  
Universität München, Munich, Germany

David Preiss, MD, PhD  
BHF Glasgow Cardiovascular Research  
Centre, University of Glasgow, Glasgow,  
UK

Jackie F. Price, MD  
Centre for Population Health  
Sciences, Medical School, University of  
Edinburgh, Edinburgh, UK

Tadeusz Przewlocki, MD, PhD, Prof.  
Department of Interventional  
Cardiology, Collegium Medicum  
Jagiellonian University, Krakow, Poland

Joel Raichlen, MD  
AstraZeneca, Wilmington, DE, USA

Peter Reaven, MD, Prof.  
Dept. of Medicine, Phoenix VA Health Care  
System, University of Arizona, Phoenix,  
USA

Peter Reiss, MD, PhD, Prof.  
Amsterdam Institute for Global Health and  
Development, University of Amsterdam,  
Amsterdam, the Netherlands  
and  
Department of Global Health, Academic  
Medical Center, Amsterdam, the  
Netherlands

Christine Robertson, MBChB  
Centre for Population Health  
Sciences, Medical School, University of  
Edinburgh, Edinburgh, UK

Kimmo Ronkainen, MSc  
Institute of Public Health and clinical  
Nutrition, University of Eastern Finland,  
Kuopio Campus, Kuopio, Finland

Emilio Ros, MD, PhD  
Endocrinology & Nutrition Service,  
Hospital Clinic, Barcelona, Spain

Signe Rosenlund, MD  
Steno Diabetes Center, Gentofte,  
Denmark

Peter Rossing, MD, DMSc, Prof.  
Steno Diabetes Center, Gentofte,  
Denmark

Maria Rosvall, MD, PhD, Assoc. Prof.  
Department of Clinical Sciences in Malmö,  
Lund University, Malmö, Sweden

Francesco Rozza, MD, Prof.  
Department of Medicine and Surgery,  
University of Salerno, Salerno, Italy

Tatjana Rundek, MD, PhD, Prof.  
Department of Neurology, Miller School of  
Medicine, University of Miami, Miami, USA

## SUPPLEMENTARY DATA

Mohammad Saadatnia, MD, Assoc. Prof.  
Al-Zahra Hospital, Isfahan University of  
Medical Sciences, Isfahan, Iran

Ralph L. Sacco, MD, MS, Prof.  
Department of Neurology, Miller School of  
Medicine, University of Miami, Miami, USA

Maya Safarova, M.D.  
Atherosclerosis Department, Cardiology  
Research Center, Moscow, Russia

Dirk Sander, MD, Prof  
Department of Neurology, Benedictus  
Hospital Tutzing & Feldafing, Feldafing,  
Germany  
and  
Department of Neurology, Technische  
Universität München, Munich, Germany

Kerstin Sander, MD, PD  
Department of Psychosomatic, Schön  
Klinik, Berchtesgadener Land, Germany

Eiichi Sato, MD  
Division of Nephrology, Department of  
Internal Medicine, Chiba, Japan

Naveed Sattar, MD, PhD, Prof  
BHF Glasgow Cardiovascular Research  
Centre, University of Glasgow, Glasgow,  
UK

Christos Savopoulos, MD, PhD, Assoc.  
Prof  
1st Propedeutic Department of Internal  
Medicine, Aristotles University of  
Thessaloniki, Thessaloniki, Greece

Frank Scheckenbach, MSc, PhD  
Department of Neurology, Goethe  
University, Frankfurt am Main, Germany

Caroline Schmidt, PhD, Assoc. Prof.  
Walleng Laboratory for Cardiovascular  
Research, University of Gothenburg,  
Gothenburg, Sweden

Irene Schmidtman, Dr.  
Institut fuer Medizinische Biometrie,  
Epidemiologie und Informatik (IMBEI),  
Universitaetsmedizin Mainz, Mainz,  
Germany

Ulf Schminke, MD, Prof  
Department of Neurology, Greifswald  
University Clinic, Greifswald, Germany

Ercan Sevinc Ok, MD  
Division of Nephrology, Izmir Bozyaka  
Education and Research Hospital, Izmir,  
Turkey

Norman Sharpe, MD, Prof.  
Heart Foundation, Ellerslie, Auckland,  
New Zealand

Patrick Sheridan, MSc  
Population Health Research Institute,  
McMaster University, Hamilton, Ontario,  
Canada

Andrew Sherwood, PhD  
Department of Psychiatry and Behavioral  
Sciences, Duke University Medical  
Center, Durham, NC 27710, USA

Cesare R. Sirtori, MD, PhD, Prof.  
Center of Dyslipidemias, Niguarda Ca'  
Granda Hospital, Milano, Italy

Matthias Sitzer, MD, Prof.  
Department of Neurology, Klinikum  
Herford, Herford, Germany  
and  
Department of Neurology, Goethe  
University, Frankfurt am Main, Germany

Michael Skilton, PhD  
Boden Institute of Obesity, Nutrition,  
Exercise and Eating Disorders, University  
of Sydney, Sydney, Australia

Patrick J Smith, PhD, MPH  
Department of Psychiatry and Behavioral  
Sciences, Duke University Medical  
Center, Durham, NC 27710, USA

Igor A. Sobenin, MD, PhD, DSc  
Laboratory of Angiopathology, Institute of  
General Pathology and Pathophysiology,  
Moscow, Russia  
and  
Laboratory of Medical Genetics,  
Department of Cardiovascular  
Pathology, AM Myasnikov Institute of  
Clinical Cardiology, Russian Cardiology  
Research and Production Complex,  
Moscow, Russia

J. David Spence, MD, FRCPC, FAHA  
Stroke Prevention & Atherosclerosis  
Research Centre, Robarts Research  
Institute, Western University, London,  
Canada

Sathanur R. Srinivasan, PhD, Prof.  
Center for Cardiovascular Health,  
Department of Epidemiology,  
Biochemistry, Tulane University School of  
Public Health and Tropical Medicine, New  
Orleans, USA

Daniel Staub, MD, Prof.  
Department of Angiology, University  
Hospital Basel, Basel, Switzerland

CDA Stehouwer, MD, PhD, FESC  
Department of Internal Medicine and  
Cardiovascular Research Institute  
Maastricht (CARIM), Maastricht University  
Medical Centre, Maastricht, the  
Netherlands

Helmuth Steinmetz, MD, Prof  
Department of Neurology, University  
Hospital, Goethe University, Frankfurt am  
Main, Germany

Radojica Stolic, MD, PhD, Prof  
Faculty of Medicine, University of  
Kragujevac, Kragujevac, Serbia

Erik Stroes, MD, PhD  
Department of Vascular Medicine,  
Academic Medical Center, Amsterdam,  
the Netherlands

Ta-Chen Su, MD, PhD, Assoc. Prof.  
Department of Internal Medicine, National  
Taiwan University Hospital, Taipei, Taiwan

Carmen Suarez, MD, PhD  
Internal Medicine Department, Hospital  
Universitario de la Princesa, Universidad  
Autónoma de Madrid, Madrid, Spain

Ivan S. Tasic, MD, PhD, Prof.  
Faculty of Medicine, Institute for Therapy  
and Rehabilitation, University of Nis,  
"Niska Banja", Serbia

Rodolphe Thiébaud, Dr.  
Centre de Recherche INSERM  
U.897, Institut de Santé Publique,  
Epidémiologie et Développement  
(ISPAD), Université Victor Segalen  
Bordeaux 2, Bordeaux Cedex, France

Peter L. Thompson, Clinical Professor,  
MD, FRACP, FACC, MBA  
Heart Research Institute of WA and  
Department of Cardiovascular Medicine,  
Sir Charles Gairdner Hospital, Nedlands,  
Australia

Simon G. Thompson, DSc, Prof.  
Department of Public Health and Primary  
Care, School of Clinical  
Medicine, University of Cambridge,  
Cambridge, UK

Estefania Toledo, MD, MPH, PhD  
Centro de Investigación Biomédica en  
Red-Fisiopatología de la Obesidad y la  
Nutrición (CIBERObn), Spain  
and  
Department of Preventive Medicine and  
Public Health, University of Navarra,  
Pamplona, Spain

Elena Tremoli, PhD, Prof  
Centro Cardiologico Monzino, IRCCS,  
Milan, Italy  
and  
Dipartimento di Scienze Farmacologiche e  
Biomolecolari, Università di Milano, Milan,  
Italy

Devjit Tripathy, MD, PhD  
University of Texas Health Science  
Center, San Antonio, USA

Giovanni Tripepi, MSc  
Clinical Epidemiology and  
Pathophysiology of Renal Diseases and  
Hypertension Unit, Institute of Physiology  
of the National Research Council (CNR),  
Reggio Calabria, Italy

Tomi-Pekka Tuomainen, MD, PhD, Prof  
Institute of Public Health and Clinical  
Nutrition, University of Eastern Finland,  
Kuopio Campus, Kuopio, Finland

Aleksandra Uruska, MD, PhD  
Department of Internal Medicine and  
Diabetology, Poznan University of Medical  
Sciences, Poznan, Poland

Heiko Uthoff, MD  
Department of Angiology, University  
Hospital Basel, Basel, Switzerland

Fabrizio Veglia, PhD  
Centro Cardiologico Monzino, IRCCS,  
Milan, Italy

## SUPPLEMENTARY DATA

Frank L.J. Visseren, MD, Prof  
Department of Vascular Medicine,  
University Medical Centre Utrecht,  
Utrecht, the Netherlands

Henry Völzke, MD, Prof  
Institute for Community Medicine,  
SHIP/Clinical-Epidemiological Research,  
Greifswald, Germany

Kristian Wachtell, MD, PhD, Assoc. Prof.  
Department of Cardiology, Gentofte  
University Hospital, Copenhagen,  
Denmark

Matthew Walters, Prof.  
Institute of Cardiovascular and Medical  
Sciences, University of Glasgow, Glasgow,  
UK

Thapat Wannarong, Dr  
Stroke Prevention & Atherosclerosis  
Research Centre, Robarts Research  
Institute, Western University, Mahidol  
University, London/Bangkok,  
Canada/Thailand

Gillian Whalley, PhD, Prof.  
Faculty of Social and Health Sciences,  
Unitec, Auckland, New Zealand

Johann Willeit, MD, Prof.  
Department of Neurology, Medical  
University Innsbruck, Innsbruck, Austria

Peter Willeit, PhD  
Department of Neurology, Medical  
University Innsbruck, Innsbruck, Austria  
and  
Department of Public Health and Primary  
Care, School of Clinical  
Medicine, University of Cambridge,  
Cambridge, UK

Miles D. Witham, Dr.  
Ninewells Hospital, Ageing and Health  
Ninewells Hospital, Ninewells Hospital &  
Medical School, Dundee, UK"

Wuxiang Xie, MD, PhD, Assist. Prof.  
Department of Epidemiology, Beijing  
Institute of Heart, Lung and Blood Vessel  
Diseases, Beijing Anzhen Hospital, Capital  
Medical University, Beijing, China

Kiyofumi Yamada, MD, PhD  
Departments of Neurosurgery, Gifu  
University Graduate School of Medicine,  
Gifu, Japan

David N. Yanez, PhD, Assoc. Prof  
Department of Biostatistics, University of  
Washington, Seattle, USA

Shinichi Yoshimura, MD, PhD, Assoc.  
Prof.  
Departments of Neurosurgery, Gifu  
University Graduate School of Medicine,  
Gifu, Japan

Wen-Chung Yu, MD; Assoc. Prof  
National Yang-Ming University, Taipei,  
Taiwan  
and  
Division of Cardiology, Taipei Veterans  
General Hospital, Taipei, Taiwan

Salim Yusuf, MD, Dphil  
Department of Medicine and Population  
Health Research Institute, McMaster  
University, Hamilton, Ontario, Canada

Dong Zhao, MD, PhD, Prof.  
Department of Epidemiology, Beijing  
Institute of Heart, Lung and Blood Vessel  
Diseases, Beijing Anzhen Hospital, Capital  
Medical University, Beijing, China

Carmine Zoccali, MD, Prof.  
Clinical Epidemiology and  
Pathophysiology of Renal Diseases and  
Hypertension Unit, Institute of Physiology  
of the National Research Council (CNR),  
Reggio Calabria, Italy

Sophia Zoungas, Assoc. Prof.  
School of Public Health and Preventive  
Medicine, Monash University, Melbourne,  
Australia

Dorota A. Zozulinska-Ziólkiewicz, MD,  
PhD, Prof.  
Department of Internal Medicine and  
Diabetology, Poznan University of Medical  
Sciences, Poznan, Poland

Eric de Groot, MD, PhD  
Vascular Medicine, Academic Medical  
Centre, F4-159.2, Amsterdam, the  
Netherlands

Nicola de Luca, MD, Prof.  
School of Medicine, Federico II University,  
Naples, Italy

Pieter M. ter Wee, Prof Dr.  
Department of Nephrology, Medical  
Center, VU University Amsterdam,  
Amsterdam, the Netherlands

Michiel A. van Agtmael, MD, PhD  
VU University Medical Center,  
Amsterdam, the Netherlands

Wiek van Gilst, PhD, Prof  
Department of Experimental Cardiology,  
University Medical Center Groningen,  
Groningen, the Netherlands

Marit G. A. van Vonderen, MD, PhD  
Medical Center Leeuwarden,  
Leeuwarden, the Netherlands

Statistical Advisor:  
Simon Thompson, DSc, Prof  
Department of Public Health and Primary  
Care, School of Clinical  
Medicine, University of Cambridge,  
Cambridge, UK

Principal Investigator:  
Matthias W. Lorenz, MD, PD  
Department of Neurology, Goethe  
University, Frankfurt am Main, Germany
